# Supplementary material
Source: PubMed Central journal article supplement (PMC2555928)
Supplement: E08-07-0716_1.pdf [file E08-07-0716_1.pdf]

## SUPPLEMENTAL FIGURE LEGENDS

**Figure S1. *rbsn* and *Rab5* epithelial phenotypes.** A-B: In adult ovaries, WT (GFP-positive, green in A) follicle cells form an epithelial monolayer, while clones of *MENE(2L)-C* (*rbsn*, GFP-negative in B) often multilayer and invade the wild-type germ cell cluster. Cells are stained with phalloidin (red) to mark cortical actin. C-D: Notch trafficking assay in *Rab5* mutant eye imaginal discs. After 10 minutes high levels of Notch (green) are present at the cell periphery (C) and persist after 5 hours (D). Cell outlines are labeled by staining for actin (red). Follicle cell clones were generated as in {Bilder, 2000 #3}. Scalebars, 100  $\mu$ m in A-B, 10  $\mu$ m in C-D.

**Figure S2. *Rbsn* and *Avl* remain distinct from activated *Rab4* and *Rab11*.** Expression of YFP-tagged versions of constitutively active *Rab4* (A, green) or *Rab5* (B, green) in larval muscle cells under control of *MEF2-Gal4*. L3 larvae were dissected and stained for *Avl* (red) and *Rbsn* (blue). Despite some colocalization between *Avl* and *Rbsn* and *Rab4* or *Rab11* (arrowheads), most *Avl* and *Rbsn* does not localize to *Rab4*- or *Rab11*-positive structures (arrows). *UAS-Rab4QL-YFP* and *UAS-Rab11QL-YFP* were obtained from the Bloomington Stock Center. Scale, 10  $\mu$ m.

**Figure S3. Subcellular localization and RNAi phenotypes suggest that *Syntaxin16* does not function in early endocytosis.** A: *Syx16* (green, arrows) is not found in the enlarged endosomes (labeled by *Avl*, red) of wing imaginal discs expressing an activated form of *Rab5* (*Rab5DA*, {Entchev, 2000 #142}). B-C: RNAi-mediated knockdown using *en-GAL4* to drive expression of *UAS-Dicer2* and *UAS-Syx16-IR* transgenes ({Dietzl, 2007 #137} produces adult wings (C) that are indistinguishable from wild-type (B). D-F': Identical coexpression of *UAS-Vps45-IR* and *UAS-Dicer2* produces defects at larval stages: wing imaginal discs lose epithelial architecture (D) and express *Mmp1* (A') in addition to accumulating high levels of Notch (E') and *Crb* (F'). Actin (red, D-F) outlines cells, and GFP marks the *en-Gal4* expression domain. Note the expanded *Crb* domains marked by yellow arrows in C'. Scalebars, 5  $\mu$ m in A, 0.5 mm in B-C, 100  $\mu$ m in D-E, 10  $\mu$ m in F.

**Figure S4. *rbsn*, *Vps45* and *Rab5* genetically interact with *avl*.** Driving expression of a *UAS-Avl-IR* transgene {Lu, 2005 #27} with *en-GAL4* (A) produces a visible phenotype in the adult wing, which is enhanced by removing one copy of *avl* (B). Removing one genomic copy of *rbsn*, *Rab5*, or *Vps45* (C-E) also enhances the RNAi phenotype. Scale, 0.5 mm.

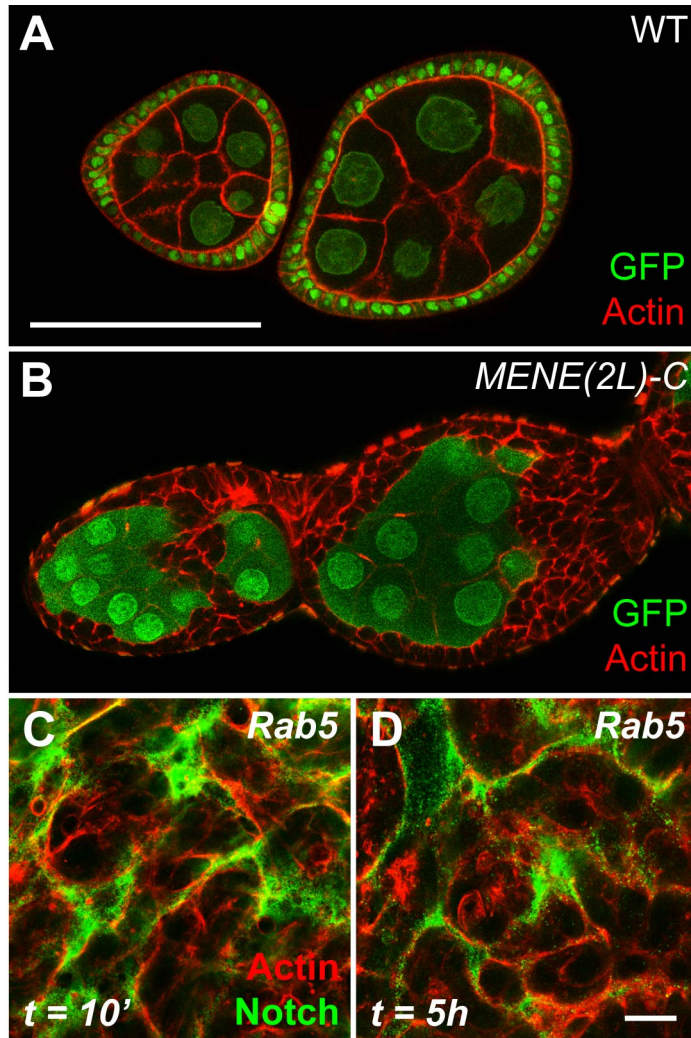

Morrison *et al.* Supplemental Figure 1

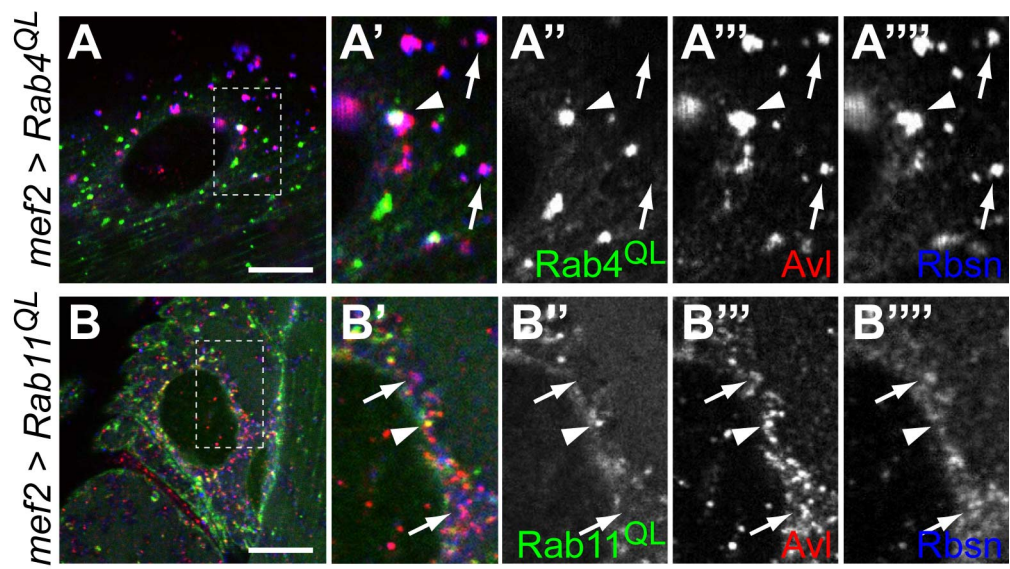

Morrison et al. Supplemental Figure 2

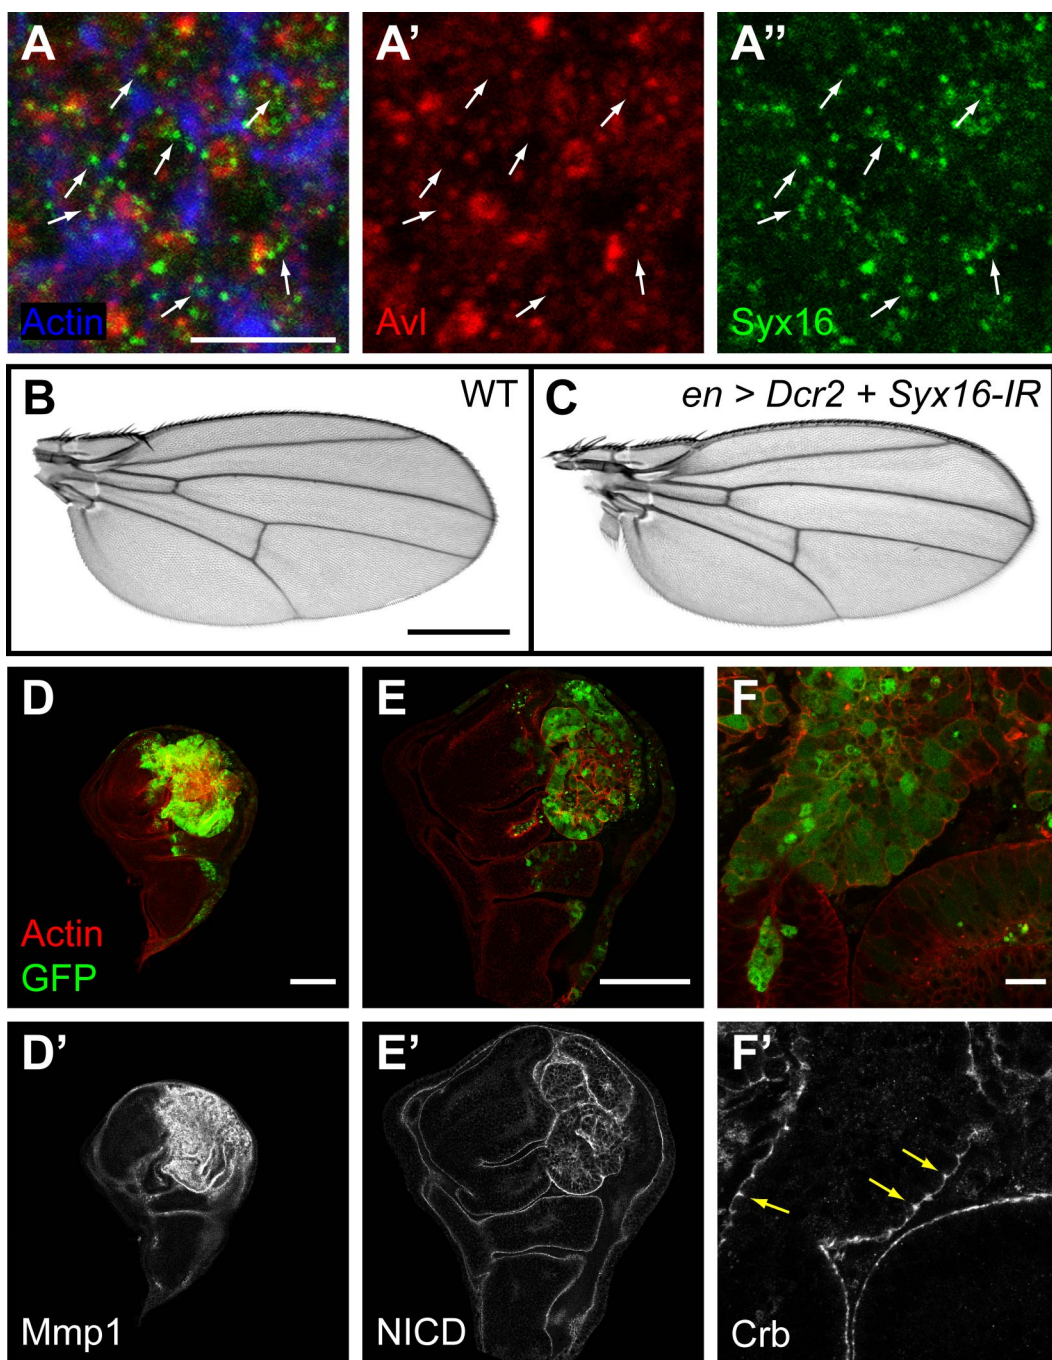

Morrison *et al.* Supplemental Figure 3

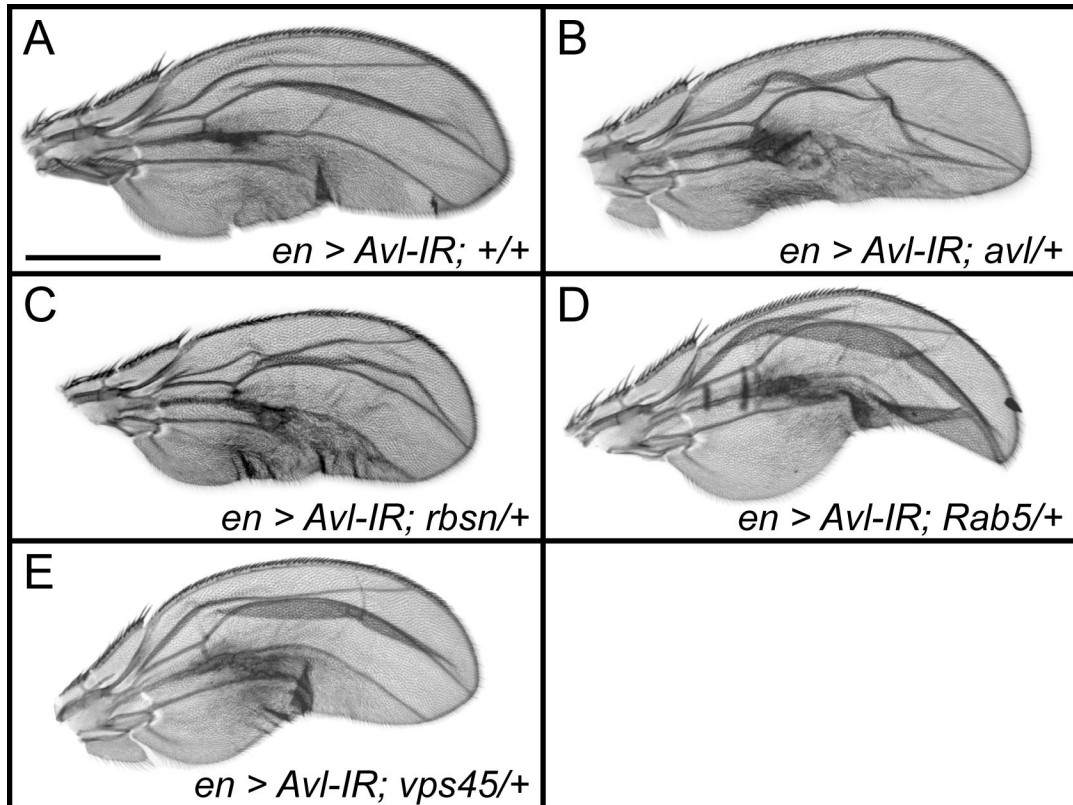

Morrison *et al.* Supplemental Figure 4
